# Supplementary material for: ZnxCo3−xO4 bimetallic oxides derived from metal–organic frameworks for enhanced acetone sensing performances
Source: Royal Society of Chemistry journal article supplement (doi:10.1039/c9qi01057b), 2019-01-01
Supplement: c9qi01057b1.pdf [file c9qi01057b1.pdf]

Electronic Supplementary Information (ESI)

For

$Zn_xCo_{3-x}O_4$  bimetallic oxides derived from metal organic frameworks for enhanced  
acetone sensing performances

Tingting Zhou<sup>a</sup>, Shuang Cao<sup>a</sup>, Rui Zhang<sup>a</sup>, Teng Fei<sup>a,b</sup>, Tong Zhang<sup>a,\*</sup>

<sup>a</sup> State Key Laboratory on Integrated Optoelectronics, College of Electronic Science and  
Engineering, Jilin University, Changchun 130012, PR China

<sup>b</sup> State Key Laboratory of Transducer Technology, Shanghai 200050, PR China

Email: zhangtong@jlu.edu.cn

\*Corresponding author:

E-mail address: zhangtong@jlu.edu.cn

**Figure S1**

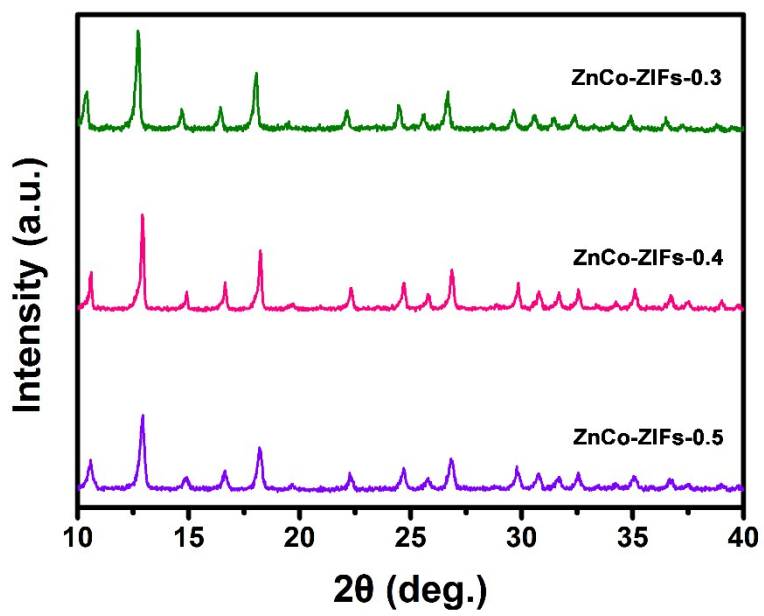

**Figure S1.** XRD pattern of ZnCo-ZIFs.

Figure S2

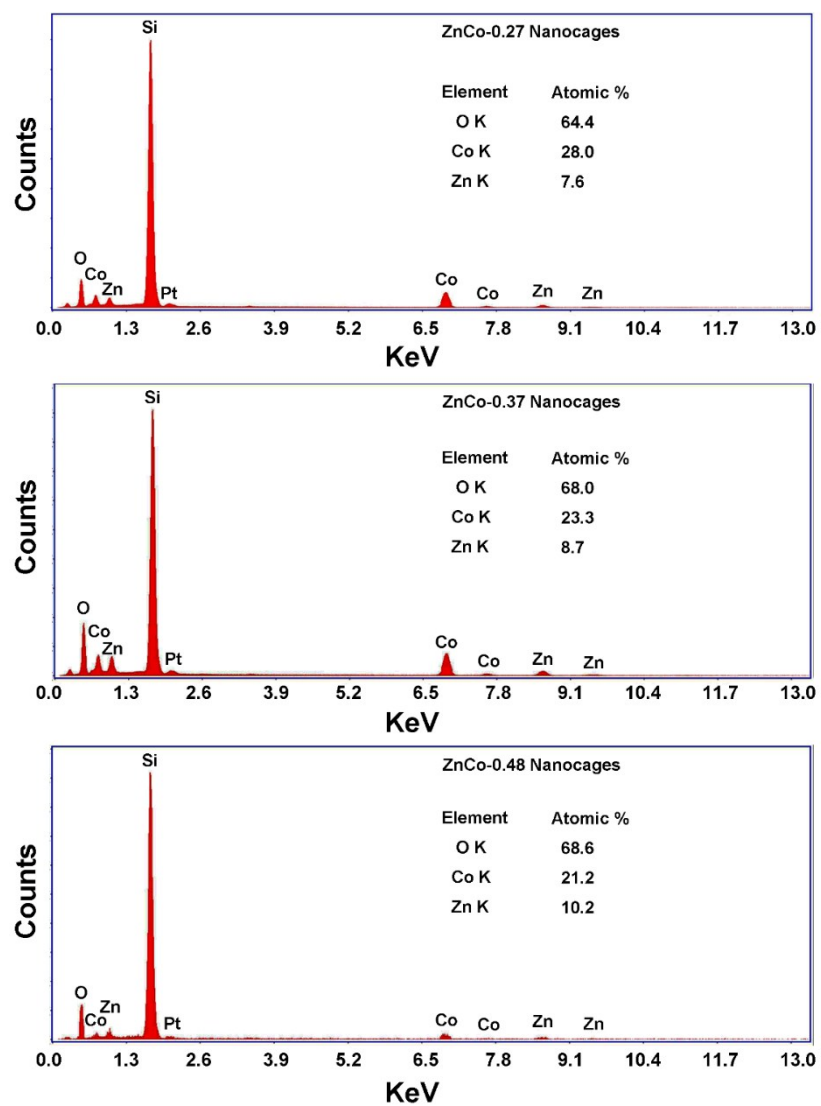

Figure S2. EDS spectrum of ZnCo-0.27 nanocages, ZnCo-0.37 nanocages and ZnCo-0.48 nanocages.

**Figure S3**

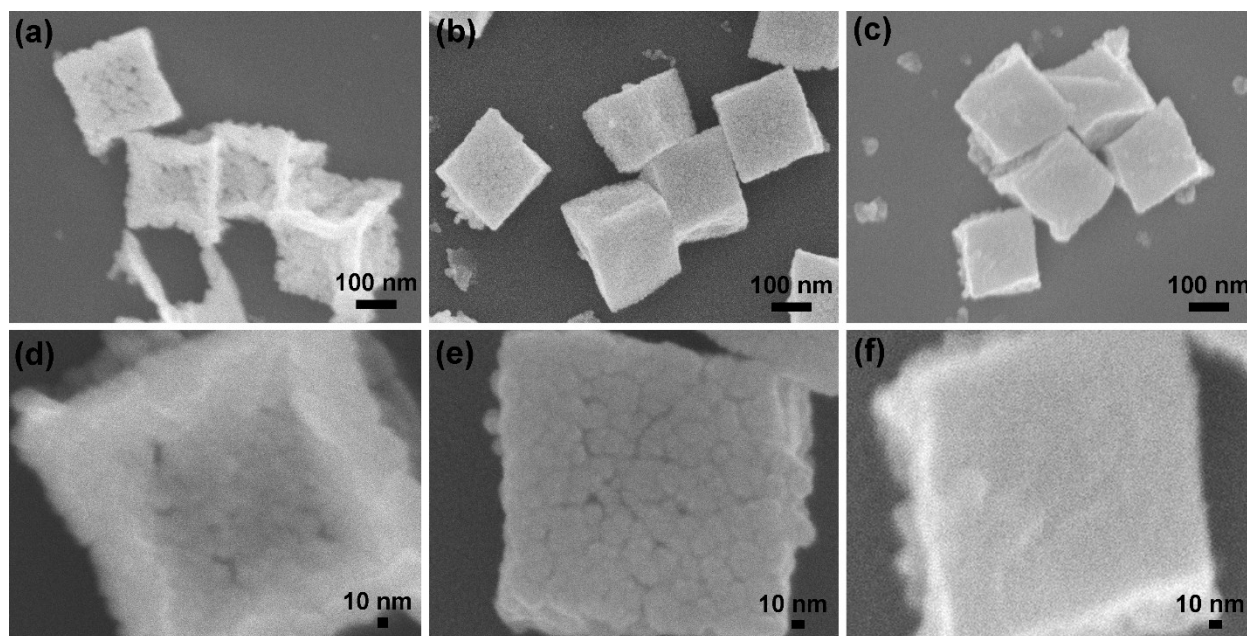

**Figure S3.** FESEM image of ZnCo-0.27 nanocages, ZnCo-0.37 nanocages and ZnCo-0.48 nanocages.

**Figure S4**

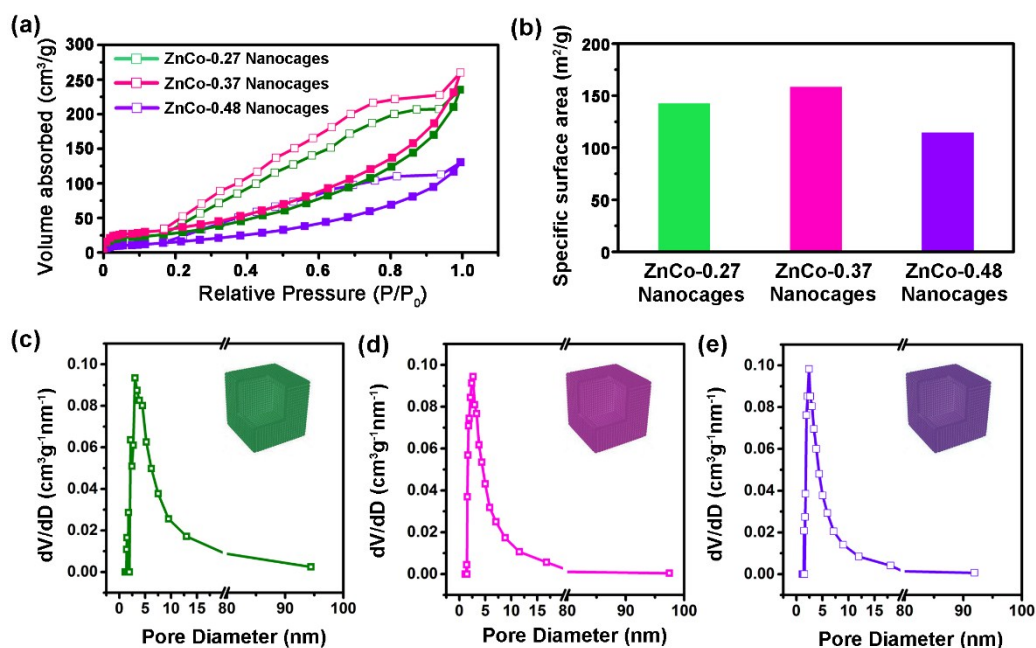

**Figure S4.** (a) Nitrogen adsorption-desorption isotherms of ZnCo-0.27, ZnCo-0.37 and ZnCo-0.48 samples; (b) specific surface area values of ZnCo-0.27, ZnCo-0.37 and ZnCo-0.48 samples ; pore size distribution curves of (c) ZnCo-0.27 nanocages; (d) ZnCo-0.37 nanocages; (e) ZnCo-0.48 nanocages.
